# Supplementary material for: Active site for syngas production by direct partial oxidation of CH4 over ZrO2
Source: Royal Society of Chemistry journal article supplement (doi:10.1039/d4cy00187g), 2024-01-01
Supplement: d4cy00187g1.pdf [file d4cy00187g1.pdf]

*Supporting information*

Active site for syngas production by direct partial oxidation of CH<sub>4</sub> over  
ZrO<sub>2</sub>

Kazumasa Murata\*, Keita Arai, Nao Kondo, Ryo Manabe, Takashi Yumura, Saburo Hosokawa\*

Mitsubishi Chemical Corporation, 1000 Kamoshida-cho, Aoba-ku, Yokohama 227-8502, Japan

Faculty of Materials Science and Engineering, Kyoto Institute of Technology, Matsugasaki, Sakyo-ku, Kyoto 606-  
8585, Japan.

Corresponding Author

\*E-mail: [kazumasa.murata.ma@mcgc.com](mailto:kazumasa.murata.ma@mcgc.com) (Kazumasa Murata), [hosokawa@kit.ac.jp](mailto:hosokawa@kit.ac.jp) (Saburo Hosokawa)

**Table S1** POM activities of oxide catalysts at 600°C. Reaction conditions: 100 mg of catalyst, 25% CH<sub>4</sub>, 12.5% O<sub>2</sub>, N<sub>2</sub> balance (CH<sub>4</sub>/O<sub>2</sub> ratio of 2.0), total flow rate of 20 mL/min, total pressure of 1 atm, and contact time of 5.0 × 10<sup>-3</sup> g<sub>cat</sub> min mL<sup>-1</sup>.

|                                 | Conversion (%)  |                | Selectivity (%) |                |                |                 |                  | Yield (%) |                |                |                 |                  |
|---------------------------------|-----------------|----------------|-----------------|----------------|----------------|-----------------|------------------|-----------|----------------|----------------|-----------------|------------------|
|                                 | CH <sub>4</sub> | O <sub>2</sub> | CO              | H <sub>2</sub> | C <sub>2</sub> | CO <sub>2</sub> | H <sub>2</sub> O | CO        | H <sub>2</sub> | C <sub>2</sub> | CO <sub>2</sub> | H <sub>2</sub> O |
| MgO                             | 0.7             | 0.0            | 78.0            | 48.0           | 0.0            | 22.0            | 52.0             | 0.6       | 0.3            | 0.0            | 0.2             | 0.3              |
| BaO                             | 0.0             | 0.0            | 0.0             | 15.9           | 0.0            | 100.0           | 84.1             | 0.0       | 0.1            | 0.0            | 0.0             | 0.6              |
| Sc <sub>2</sub> O <sub>3</sub>  | 30.2            | 87.6           | 35.3            | 33.9           | 3.8            | 60.8            | 62.2             | 10.3      | 9.7            | 1.1            | 17.8            | 17.7             |
| Y <sub>2</sub> O <sub>3</sub>   | 14.2            | 41.7           | 46.3            | 33.8           | 3.3            | 50.4            | 62.6             | 6.9       | 4.8            | 0.5            | 7.5             | 8.8              |
| TiO <sub>2</sub>                | 5.9             | 13.5           | 74.2            | 25.2           | 0.0            | 25.8            | 74.8             | 3.7       | 1.0            | 0.0            | 1.3             | 3.0              |
| ZrO <sub>2</sub>                | 29.0            | 78.2           | 47.4            | 41.3           | 0.3            | 52.3            | 58.4             | 14.0      | 12.4           | 0.1            | 15.5            | 17.5             |
| YSZ                             | 15.4            | 38.6           | 62.8            | 40.4           | 0.0            | 37.1            | 53.6             | 10.0      | 7.5            | 0.0            | 6.0             | 7.5              |
| HfO <sub>2</sub>                | 8.9             | 26.4           | 44.0            | 16.7           | 0.0            | 56.0            | 83.3             | 3.8       | 1.3            | 0.0            | 4.8             | 6.2              |
| V <sub>2</sub> O <sub>5</sub>   | 1.0             | 0.0            | 87.4            | 0.0            | 0.0            | 12.6            | 100.0            | 1.0       | 0.0            | 0.0            | 0.1             | 0.4              |
| Nb <sub>2</sub> O <sub>5</sub>  | 0.0             | 0.0            | 0.0             | 0.0            | 0.0            | 100.0           | 100.0            | 0.0       | 0.0            | 0.0            | 0.1             | 0.1              |
| Ta <sub>2</sub> O <sub>5</sub>  | 27.2            | 98.5           | 35.5            | 3.9            | 0.0            | 64.5            | 96.1             | 9.4       | 1.0            | 0.0            | 17.1            | 24.6             |
| MoO <sub>3</sub>                | 0.0             | 0.0            | 0.0             | 0.0            | 0.0            | 100.0           | 100.0            | 0.0       | 0.0            | 0.0            | 0.0             | 0.1              |
| WO <sub>3</sub>                 | 0.3             | 0.0            | 0.0             | 0.0            | 0.0            | 100.0           | 100.0            | 0.0       | 0.0            | 0.0            | 0.2             | 0.1              |
| MnO <sub>2</sub>                | 25.1            | 100.0          | 0.0             | 0.0            | 0.0            | 100.0           | 100.0            | 0.0       | 0.0            | 0.0            | 24.8            | 25.8             |
| Fe <sub>2</sub> O <sub>3</sub>  | 24.8            | 100.0          | 0.0             | 0.8            | 0.0            | 100.0           | 99.2             | 0.0       | 0.2            | 0.0            | 24.5            | 25.7             |
| Co <sub>3</sub> O <sub>4</sub>  | 24.1            | 100.0          | 0.0             | 0.0            | 0.0            | 100.0           | 100.0            | 0.0       | 0.0            | 0.0            | 24.2            | 25.0             |
| ZnO                             | 10.2            | 41.4           | 0.0             | 7.7            | 0.7            | 99.3            | 91.5             | 0.0       | 0.8            | 0.1            | 10.5            | 9.2              |
| Al <sub>2</sub> O <sub>3</sub>  | 2.2             | 6.5            | 72.5            | 35.0           | 0.0            | 27.5            | 65.0             | 2.1       | 0.7            | 0.0            | 0.8             | 1.4              |
| Ga <sub>2</sub> O <sub>3</sub>  | 19.8            | 74.2           | 20.3            | 2.1            | 2.0            | 77.7            | 96.0             | 3.9       | 0.4            | 0.4            | 15.0            | 18.9             |
| SiO <sub>2</sub>                | 0.0             | 0.0            | 0.0             | 0.0            | 0.0            | 100.0           | 100.0            | 0.0       | 0.0            | 0.0            | 0.2             | 0.3              |
| GeO <sub>2</sub>                | 0.4             | 0.0            | 0.0             | 0.0            | 0.0            | 100.0           | 100.0            | 0.0       | 0.0            | 0.0            | 0.1             | 0.1              |
| SnO <sub>2</sub>                | 24.6            | 100.0          | 0.0             | 0.0            | 0.0            | 100.0           | 100.0            | 0.0       | 0.0            | 0.0            | 23.9            | 25.1             |
| La <sub>2</sub> O <sub>3</sub>  | 8.4             | 26.1           | 35.8            | 40.0           | 1.8            | 62.4            | 58.1             | 3.3       | 3.4            | 0.2            | 5.8             | 4.9              |
| CeO <sub>2</sub>                | 25.0            | 100.0          | 1.8             | 5.2            | 0.0            | 98.2            | 94.8             | 0.4       | 1.3            | 0.0            | 24.4            | 24.1             |
| Pr <sub>6</sub> O <sub>11</sub> | 22.6            | 90.9           | 0.0             | 1.5            | 2.0            | 98.0            | 96.5             | 0.0       | 0.4            | 0.5            | 22.1            | 22.2             |
| Nd <sub>2</sub> O <sub>3</sub>  | 21.9            | 70.1           | 15.3            | 28.1           | 5.6            | 79.0            | 66.3             | 3.4       | 6.3            | 1.2            | 17.3            | 14.8             |
| Sm <sub>2</sub> O <sub>3</sub>  | 13.9            | 41.2           | 33.7            | 33.4           | 3.5            | 62.8            | 63.0             | 4.8       | 4.6            | 0.5            | 8.9             | 8.6              |
| Eu <sub>2</sub> O <sub>3</sub>  | 33.3            | 98.5           | 12.4            | 15.8           | 19.1           | 68.5            | 66.5             | 4.0       | 5.6            | 6.3            | 22.4            | 23.5             |
| Gd <sub>2</sub> O <sub>3</sub>  | 26.0            | 74.8           | 26.1            | 27.5           | 11.6           | 62.3            | 61.3             | 6.8       | 7.5            | 3.1            | 16.3            | 16.7             |
| Dy <sub>2</sub> O <sub>3</sub>  | 15.1            | 43.2           | 35.9            | 38.1           | 3.2            | 60.9            | 58.5             | 5.5       | 5.6            | 0.5            | 9.4             | 8.7              |
| Yb <sub>2</sub> O <sub>3</sub>  | 20.6            | 56.1           | 44.2            | 33.8           | 6.6            | 49.2            | 59.5             | 9.2       | 6.9            | 1.4            | 10.2            | 12.2             |

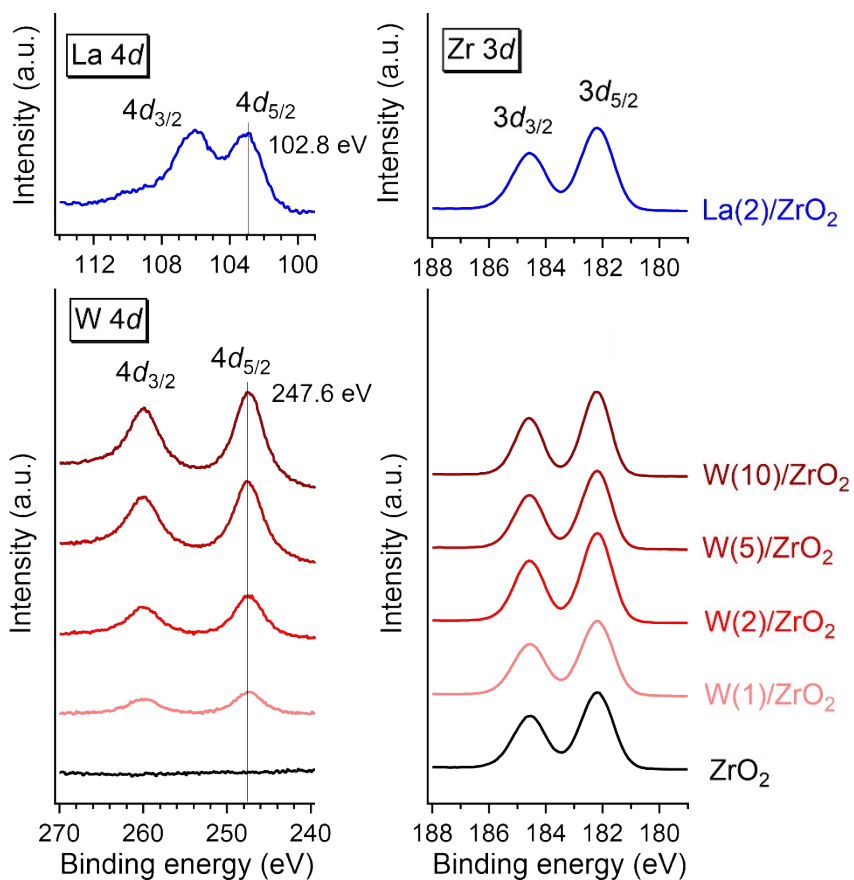

**Figure S1** XPS spectra of ZrO<sub>2</sub>-based catalysts.

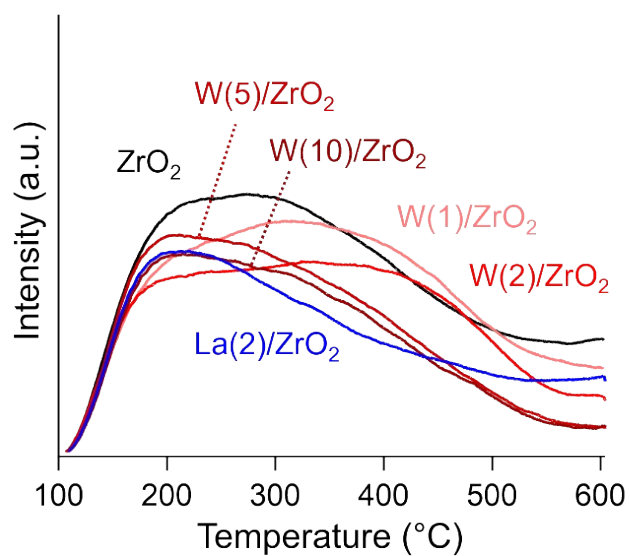

**Figure S2** NH<sub>3</sub>-TPD profiles of ZrO<sub>2</sub>-based catalysts.

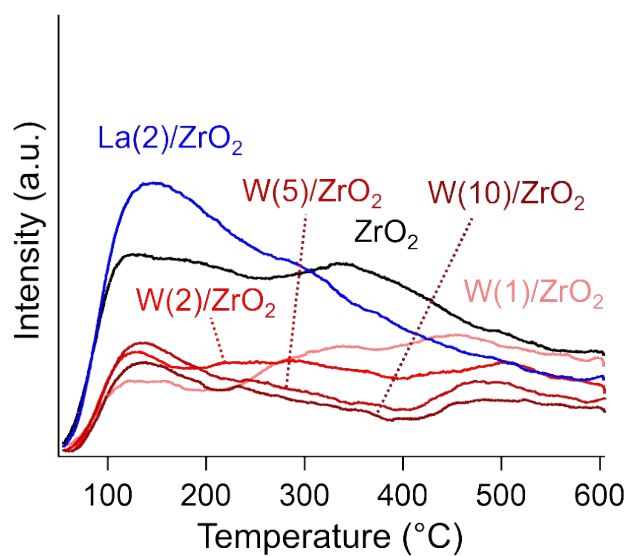

**Figure S3** CO<sub>2</sub>-TPD profiles of ZrO<sub>2</sub>-based catalysts.

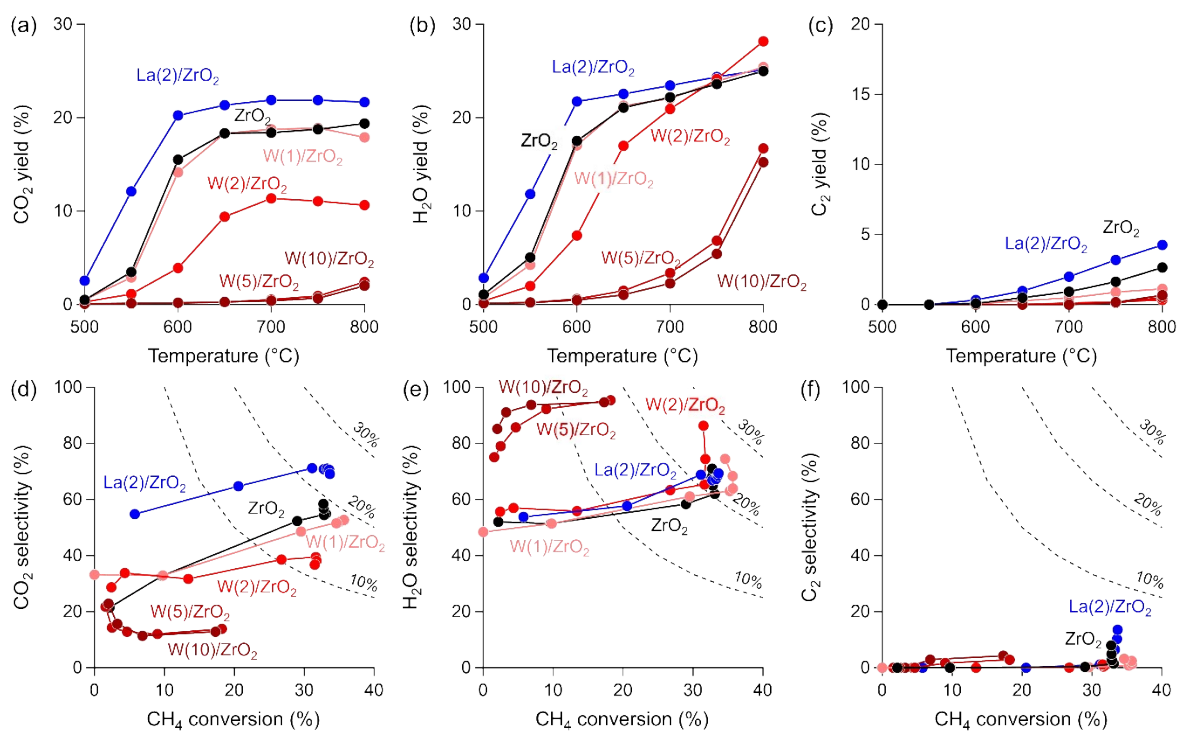

**Figure S4** (a) CO<sub>2</sub> yield, (b) H<sub>2</sub>O yield, and (c) C<sub>2</sub> yield over ZrO<sub>2</sub>-based catalysts as functions of temperature. (d) CO<sub>2</sub> selectivity, (e) H<sub>2</sub>O selectivity, and (f) C<sub>2</sub> selectivity with CH<sub>4</sub> conversion in POM over ZrO<sub>2</sub>-based catalysts. The dotted-line curves show the 10%, 20%, and 30% product yields. Reaction conditions: 100 mg of catalyst, 25% CH<sub>4</sub>, 12.5% O<sub>2</sub>, N<sub>2</sub> balance (CH<sub>4</sub>/O<sub>2</sub> ratio of 2.0), total flow rate of 20 mL/min, total pressure of 1 atm, and contact time of  $5.0 \times 10^{-3}$  g<sub>cat</sub> min mL<sup>-1</sup>.

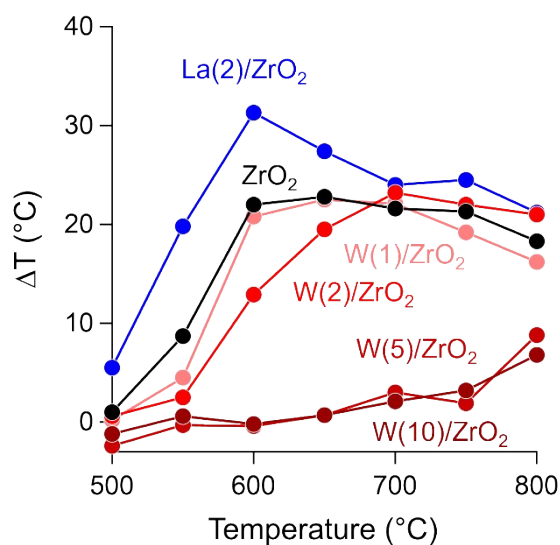

**Figure S5** Variation in temperature of catalyst bed against set temperature for POM over ZrO<sub>2</sub>-based catalysts. Reaction conditions: 100 mg of catalyst, 25% CH<sub>4</sub>, 12.5% O<sub>2</sub>, N<sub>2</sub> balance (CH<sub>4</sub>/O<sub>2</sub> ratio of 2.0), total flow rate of 20 mL/min, total pressure of 1 atm, and contact time of  $5.0 \times 10^{-3} \text{ g}_{\text{cat}} \text{ min mL}^{-1}$ .

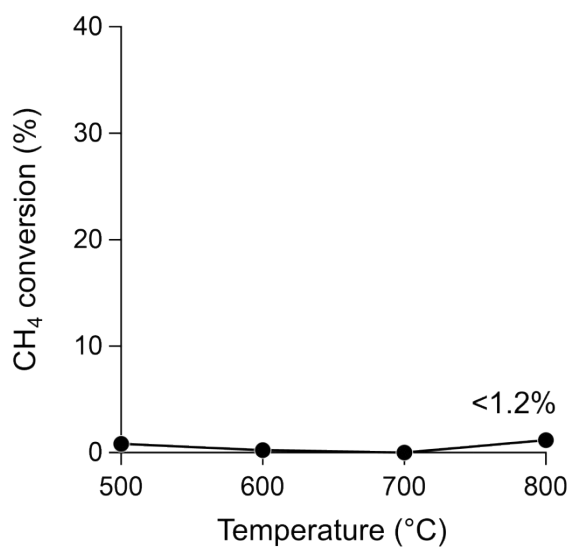

**Figure S6** CH<sub>4</sub> conversion in noncatalytic POM as function of temperature. Reaction conditions: 25% CH<sub>4</sub>, 12.5% O<sub>2</sub>, N<sub>2</sub> balance (CH<sub>4</sub>/O<sub>2</sub> ratio of 2.0), total flow rate of 20 mL/min, total pressure of 1 atm, and contact time of  $5.0 \times 10^{-3} \text{ g}_{\text{cat}} \text{ min mL}^{-1}$ .

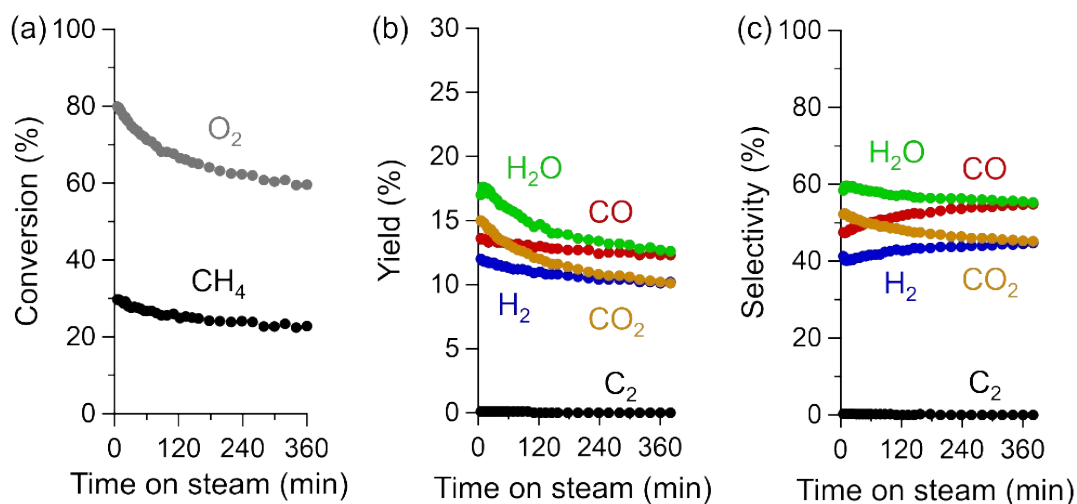

**Figure S7** Time on steam of (a) CH<sub>4</sub> and O<sub>2</sub> conversion, (b) product yield, and (c) product selectivity in POM over ZrO<sub>2</sub> catalyst. Reaction conditions: 100 mg of catalyst, 25% CH<sub>4</sub>, 12.5% O<sub>2</sub>, N<sub>2</sub> balance (CH<sub>4</sub>/O<sub>2</sub> ratio of 2.0), total flow rate of 20 mL/min, total pressure of 1 atm, contact time of  $5.0 \times 10^{-3} \text{ g}_{\text{cat}} \text{ min mL}^{-1}$ , and temperature of 600°C.

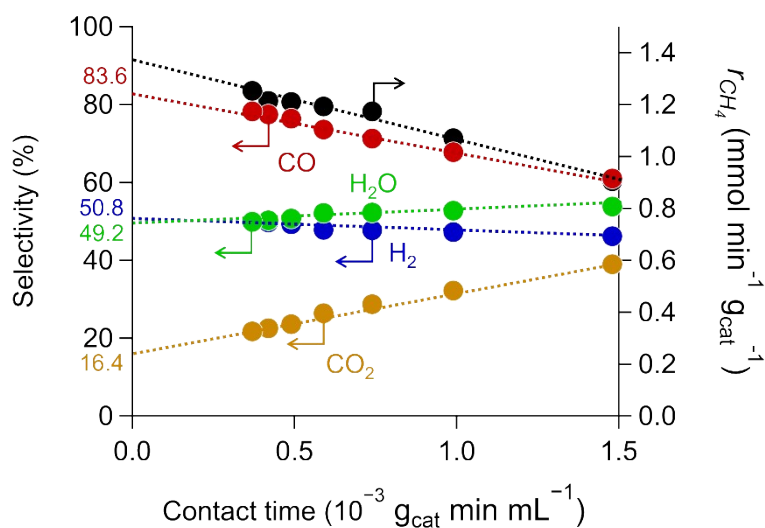

**Figure S8** Dependence of product selectivity and CH<sub>4</sub> oxidation rate on contact time in POM over ZrO<sub>2</sub> catalyst. Reaction conditions: 10 mg of ZrO<sub>2</sub> catalyst, 30% CH<sub>4</sub>, 15% O<sub>2</sub>, N<sub>2</sub> balance (CH<sub>4</sub>/O<sub>2</sub> ratio of 2.0), total flow rate of ~27 mL/min, total pressure of 1 atm, and temperature of 600°C.

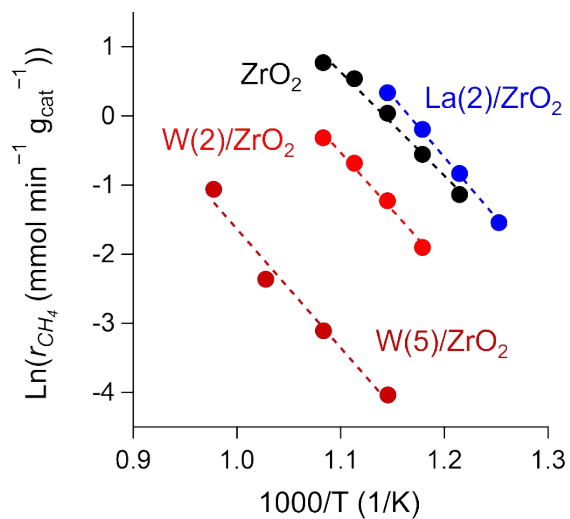

**Figure S9** Arrhenius plots of CH<sub>4</sub> oxidation rate of ZrO<sub>2</sub>-based catalysts for POM. Reaction conditions: 25% CH<sub>4</sub>, 12.5% O<sub>2</sub>, N<sub>2</sub> balance (CH<sub>4</sub>/O<sub>2</sub> ratio of 2.0), total flow rate of 20 mL/min, and total pressure of 1 atm.

**Table S2** Vibrational frequencies of reaction intermediates species on ZrO<sub>2</sub>-based catalysts.

| Wavenumber (cm <sup>-1</sup> ) | Species                                                                     | Vibrational mode                                                                | Reference    |
|--------------------------------|-----------------------------------------------------------------------------|---------------------------------------------------------------------------------|--------------|
| 3800–2500                      | H <sub>2</sub> O (adsorbed water)                                           | v(OH)                                                                           | 1,2          |
| 3780–3760                      | Terminal OH (t-OH)                                                          | v(OH)                                                                           | 3–8          |
| 3740–3730                      | Bridged OH (b-OH)                                                           | v(OH)                                                                           | 6,7          |
| 3680–3660                      | Multicoordinated OH (m-OH)                                                  | v(OH)                                                                           | 3–8          |
| 3630–3620                      | Monodentate bicarbonate (HCO <sub>3</sub> <sup>-</sup> )                    | v(OH)                                                                           | 3,6,8,9      |
| 3014                           | CH <sub>4</sub> (gas)                                                       | v <sub>a</sub> (CH)                                                             | 10           |
| 2965–2955                      | Bidentate formate (b-HCOO <sup>-</sup> )                                    | v <sub>a</sub> (OCO) + v <sub>s</sub> (OCO)<br>and δ(CH) + v <sub>s</sub> (OCO) | 3–5,7–12     |
| 2885–2870                      | Bidentate formate (b-HCOO <sup>-</sup> )                                    | v(CH)                                                                           | 3–5,7–12     |
| 1640–1600                      | Monodentate bicarbonate (m-HCO <sub>3</sub> <sup>-</sup> )                  | v <sub>a</sub> (OCO)                                                            | 3,6,8,9      |
|                                | Bridged carbonate (br-CO <sub>3</sub> <sup>-</sup> )                        | v <sub>a</sub> (OCO)                                                            | 9            |
| 1590–1550                      | Bidentate formate (b-HCOO <sup>-</sup> )                                    | v <sub>a</sub> (OCO)                                                            | 3–5,9–12     |
|                                | Bidentate carbonate (b-CO <sub>3</sub> <sup>-</sup> )                       | v <sub>a</sub> (OCO)                                                            | 3,8          |
| 1470–1430                      | Monodentate bicarbonate (m-HCO <sub>3</sub> <sup>-</sup> )                  | v <sub>s</sub> (OCO)                                                            | 3,6,9        |
|                                | Terminal CH <sub>3</sub> O <sup>-</sup> (t-CH <sub>3</sub> O <sup>-</sup> ) | δ(CH)                                                                           | 4,5,10,13,14 |
|                                | Polydentate carbonate (p-CO <sub>3</sub> <sup>-</sup> )                     | v <sub>a</sub> (OCO)                                                            | 9,12         |
| 1400–1320                      | Bidentate formate (b-HCOO <sup>-</sup> )                                    | δ(CH) and v <sub>s</sub> (OCO)                                                  | 3–5,7–12     |
|                                | Polydentate carbonate (p-CO <sub>3</sub> <sup>-</sup> )                     | v <sub>s</sub> (OCO)                                                            | 9,12         |
|                                | Bidentate carbonate (b-CO <sub>3</sub> <sup>-</sup> )                       | v <sub>s</sub> (OCO)                                                            | 3,8          |
|                                | Bridged carbonate (br-CO <sub>3</sub> <sup>-</sup> )                        | v <sub>s</sub> (OCO)                                                            | 9            |
| 1304                           | CH <sub>4</sub> (gas)                                                       | δ(CH)                                                                           | 10           |
| 1150–1130                      | Terminal CH <sub>3</sub> O <sup>-</sup> (t-CH <sub>3</sub> O <sup>-</sup> ) | v(CO)                                                                           | 4,5,10,13,14 |



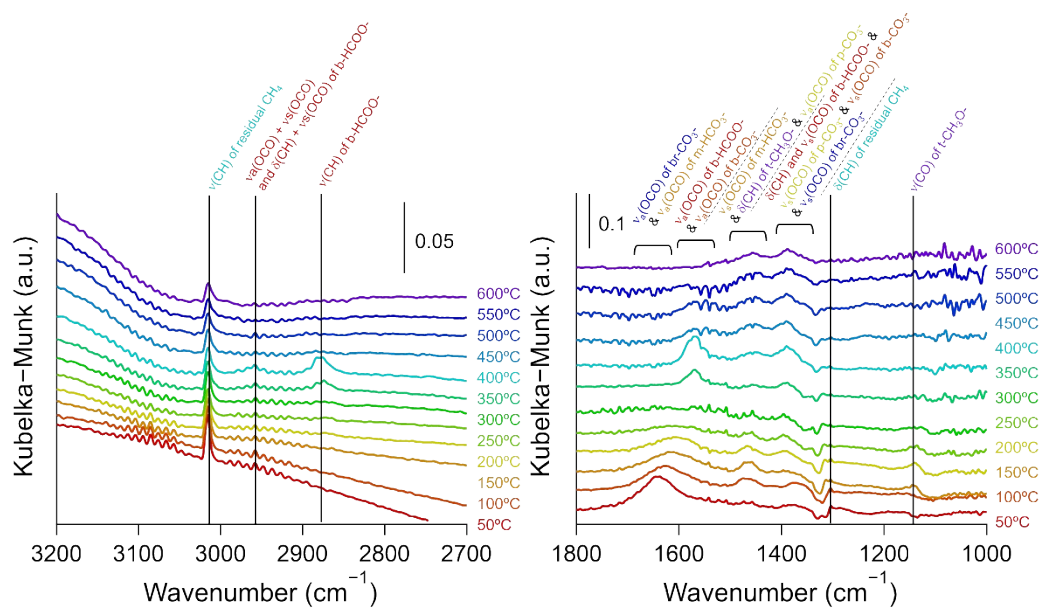

**Figure S10** In situ DRIFTS spectra of ZrO<sub>2</sub> catalyst in Ar flow after POM.

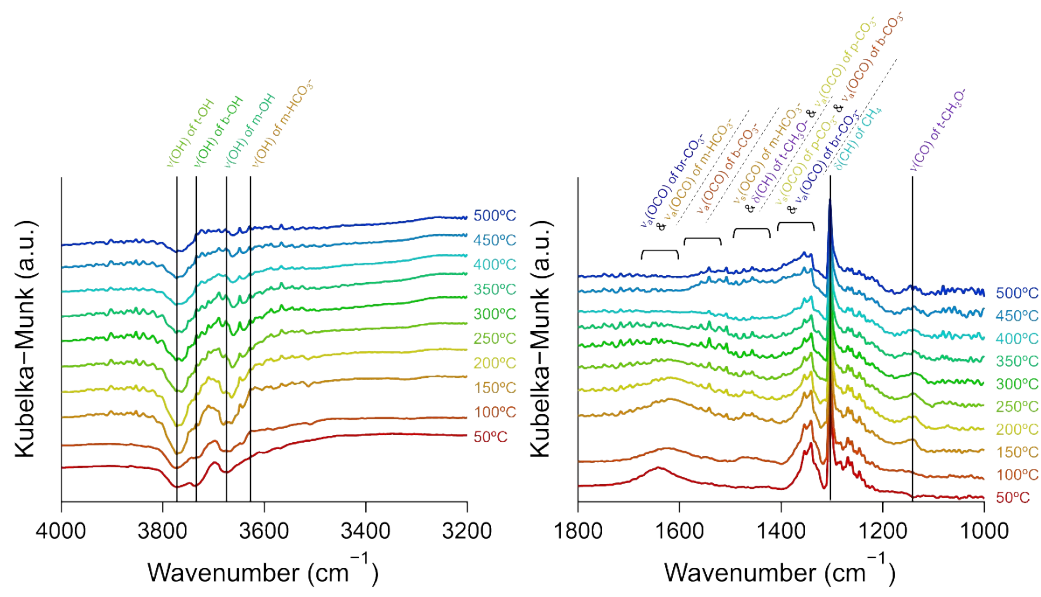

**Figure S11** In situ DRIFTS spectra of ZrO<sub>2</sub> catalyst in 25% CH<sub>4</sub>/N<sub>2</sub> flow.

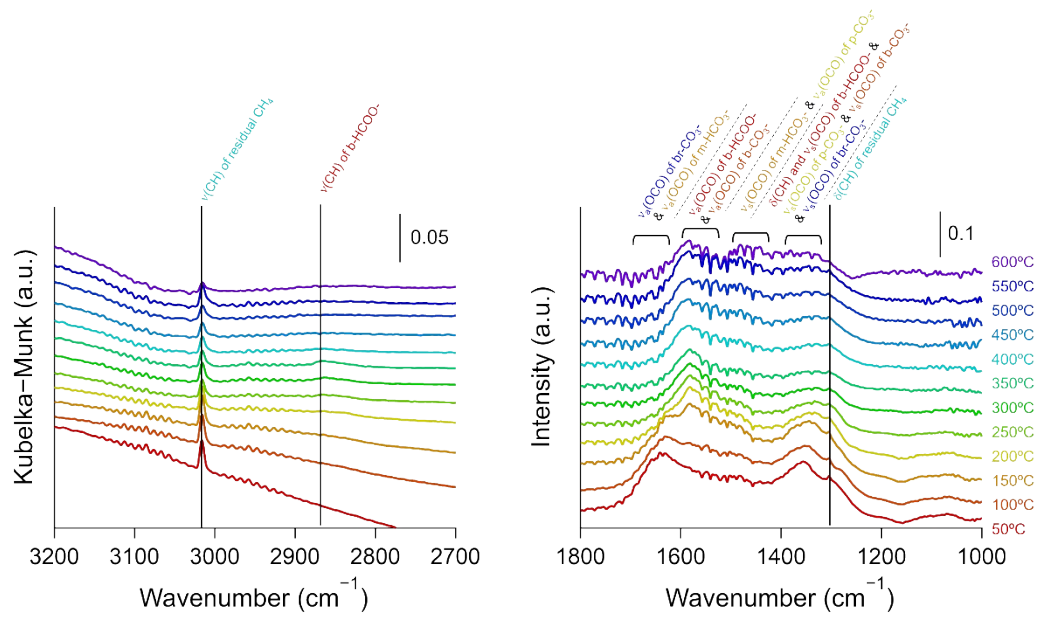

**Figure S12** In situ DRIFTS spectra of La(2)/ZrO<sub>2</sub> catalyst in Ar flow after POM.

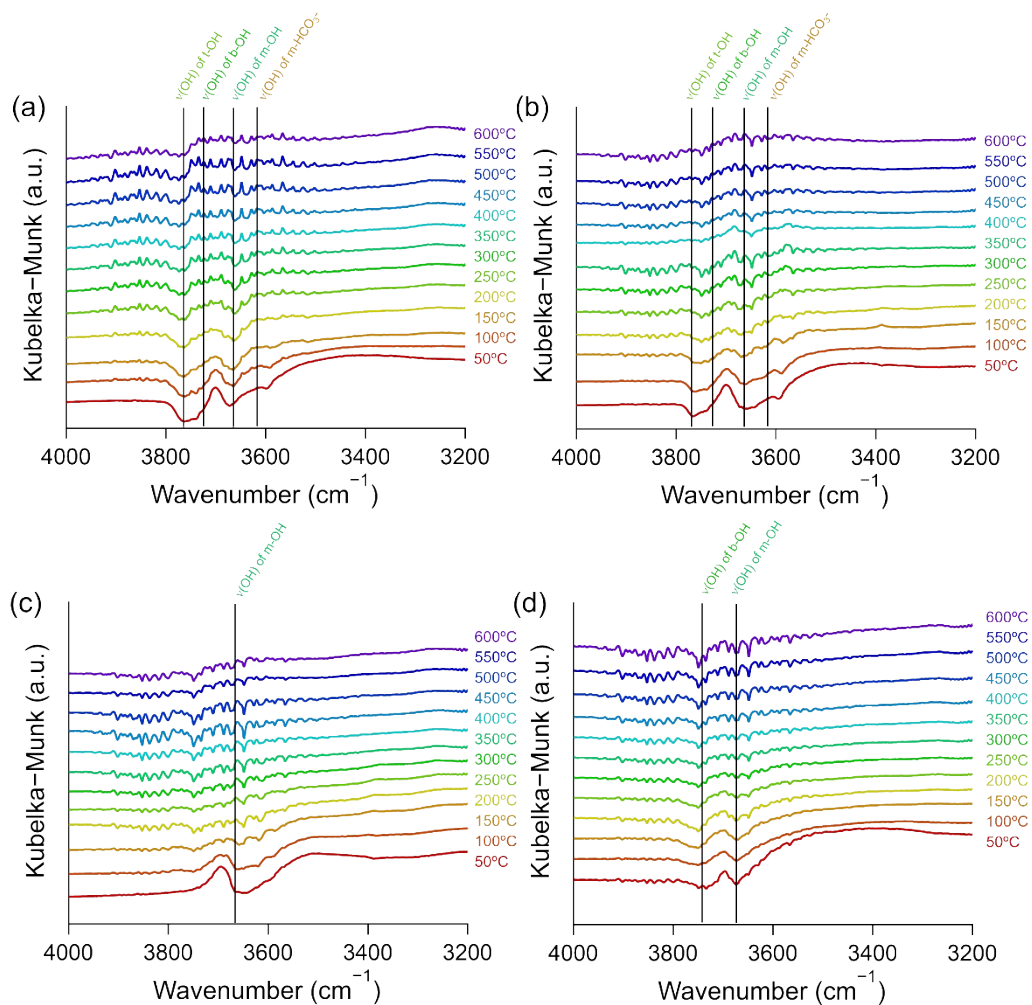

**Figure S13** In situ DRIFTS spectra of ZrO<sub>2</sub>-based catalysts during POM: (a) W(1)/ZrO<sub>2</sub>, (b) W(2)/ZrO<sub>2</sub>, (c) W(5)/ZrO<sub>2</sub>, and (d) La(2)/ZrO<sub>2</sub>. Reaction conditions: 25% CH<sub>4</sub>, 12.5% O<sub>2</sub>, N<sub>2</sub> balance (CH<sub>4</sub>/O<sub>2</sub> ratio of 2.0), total flow rate of 40 mL/min, and total pressure of 1 atm.

## DFT setting and modeling of ZrO<sub>2</sub> catalyst

To model the ZrO<sub>2</sub> catalyst, we considered its monoclinic phase and ( $\bar{1}11$ ) surfaces which were energetically stable. A  $2 \times 2 \times 1$  monoclinic ( $\bar{1}11$ ) ZrO<sub>2</sub> surface containing Zr<sub>48</sub>O<sub>96</sub> was constructed, as shown in Figure S14. A vacuum spacing of 16 Å was added along the *c* axis, which was large enough to prevent interactions between each surface model along the axis. Using the monoclinic ZrO<sub>2</sub> model, we optimized the atomic configurations of the local minima and transition states during methane activation. In supercell calculations, Brillouin zone sampling was restricted to the  $\Gamma$  point, and energies were converged at a  $1.0 \times 10^{-5}$  eV tolerance. To identify the transition states, we adopted the CI-NEB method using four intermediate images. The local minima and transition states in methane activation were optimized by fixing the lattice parameters in the surface supercell, fully relaxing the positions of the atoms contained in an upper layer, and fixing those of the atoms in the bottom layer (inside the red rectangle in Figure S14). The optimization was deemed to have converged when the maximum forces on all atoms were less than 0.05 eV/Å.

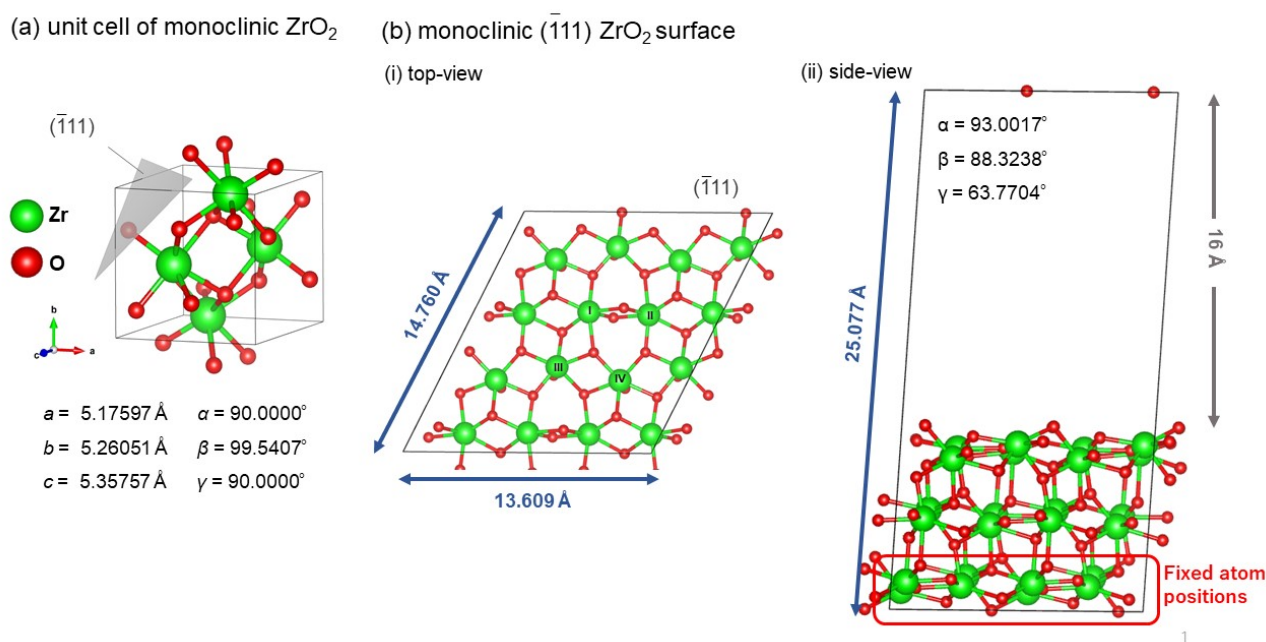

**Figure S14** (a) Unit cell of studied monoclinic ZrO<sub>2</sub> and (b) its surface. The Zr atoms labeled I, III, and IV were coordinated by six oxygen atoms, and the Zr atom labeled II was coordinated by seven oxygen atoms. Accordingly, coordinatively unsaturated Zr atoms, labeled I, III, and IV, enabled the binding of H<sub>2</sub>O molecules in the atmosphere to the Zr atoms, thus generating HO-attached ZrO<sub>2</sub> surfaces with oxygen monovacancies.

**Table S3** Geometric changes in methane before and after its interaction with oxygen-deficient ZrO<sub>2</sub> surface, obtained via PBE DFT calculations.

|                                     | Methane | Methane bound to oxygen-deficient ZrO <sub>2</sub> surface |
|-------------------------------------|---------|------------------------------------------------------------|
| <i>B</i> [C–H(a)] <sup>a</sup>      | 1.096   | 1.100                                                      |
| <i>B</i> [C–H(b)] <sup>a</sup>      | 1.096   | 1.099                                                      |
| <i>B</i> [C–H(c)] <sup>a</sup>      | 1.096   | 1.096                                                      |
| <i>B</i> [C–H(d)] <sup>a</sup>      | 1.096   | 1.094                                                      |
| <i>A</i> [H(b)–C–H(a)] <sup>b</sup> | 109.5   | 112.5                                                      |
| <i>A</i> [H(b)–C–H(d)] <sup>b</sup> | 109.5   | 109.2                                                      |
| <i>A</i> [H(b)–C–H(c)] <sup>b</sup> | 109.5   | 108.4                                                      |
| <i>A</i> [H(a)–C–H(d)] <sup>b</sup> | 109.5   | 108.7                                                      |
| <i>A</i> [H(a)–C–H(c)] <sup>b</sup> | 109.5   | 107.6                                                      |
| <i>A</i> [H(d)–C–H(c)] <sup>b</sup> | 109.5   | 110.4                                                      |

<sup>a</sup> *B* indicates the bond lengths (Å) between the atoms in the parentheses.

<sup>b</sup> *A* indicates the angles (°) between the atoms in the parentheses.

## References

- (1) Sagadevan, S.; Podder, J.; Das, I. *J. Mater. Sci. Mater. Electron.* **2016**, *27*, 5622–5627.
- (2) Ishikawa, H.; Kondo, J. N.; Domen, K. *J. Phys. Chem. B* **1999**, *103*, 3229–3234.
- (3) Kondo, J.; Abe, H.; Sakata, Y.; Maruya, K. I.; Domen, K.; Onishi, T. *J. Chem. Soc. Faraday Trans.* **1988**, *84*, 511–519.
- (4) Ouyang, F.; Kondo, J. N.; Maruya, K.; Domen, K. *J. Phys. Chem. B* **1997**, *101*, 1–3.
- (5) Ouyang, F.; Nakayama, A.; Tabada, K.; Suzuki, E. *J. Phys. Chem. B* **2000**, *104*, 2012–2018.
- (6) Bachiller-Baeza, B.; Rodriguez-Ramos, I.; Guerrero-Ruiz, A. *Langmuir* **1998**, *14*, 3556–3564.
- (7) Kouva, S.; Honkala, K.; Lefferts, L.; Kanervo, J. *Catal. Sci. Technol.* **2015**, *5*, 3473–3490.
- (8) Kouva, S.; Andersin, J.; Honkala, K.; Lehtonen, J.; Lefferts, L.; Kanervo, J. *Phys. Chem. Chem. Phys.* **2014**, *16*, 20650–20664.
- (9) Ko, E.; Kogler, M.; Bielz, T.; Klo, B.; Penner, S. *J. Phys. Chem. C* **2013**, *117*, 17666–17673.
- (10) He, Y.; Guo, F.; Yang, K. R.; Heinlein, J. A.; Bamonte, S. M.; Fee, J. J.; Hu, S.; Suib, S. L.; Haller, G. L.; Batista, V. S.; Pfefferle, L. D. *J. Am. Chem. Soc.* **2020**, *142*, 17119–17130.
- (11) Zhu, J.; Van Ommen, J. G.; Lefferts, L. *J. Catal.* **2004**, *225*, 388–397.
- (12) Jung, K.; Bell, A. T. *J. Catal.* **2000**, *193*, 207–223.
- (13) Wu, C.; Lin, L.; Liu, J.; Zhang, J.; Zhang, F.; Zhou, T.; Rui, N.; Yao, S.; Deng, Y.; Yang, F.; Xu, W.; Luo, J.; Zhao, Y.; Yan, B.; Wen, X. D.; Rodriguez, J. A.; Ma, D. *Nat. Commun.* **2020**, *11*, 5767.
- (14) Binet, C.; Daturi, M. *Catal. Today* **2001**, *70*, 155–167.
- (15) Ko, E.; Kogler, M.; Bielz, T.; Klötzer, B.; Penner, S. *J. Phys. Chem. C* **2013**, *117*, 17666–17673.
